# Supplementary material
Source: Springer Nature journal article supplement (https://www.springermedizin.de/resource/supplementary/13018_2010_271_MOESM8_ESM.pdf/9636672)
Supplement: MOESM8 [file 9636672]

| Reference                      | Graphics                                                                            | Prosthesis                                                                          | Fixation Technique |                  |                                                                                                  |                       |                    |                          |
|--------------------------------|-------------------------------------------------------------------------------------|-------------------------------------------------------------------------------------|--------------------|------------------|--------------------------------------------------------------------------------------------------|-----------------------|--------------------|--------------------------|
|                                |                                                                                     |                                                                                     | # fins             | # holes          | # of strands GT-shaft                                                                            | # of strands LT-shaft | # of strands LT-GT | # of strands LT-GT Shaft |
| (Frankle and Mighell 2004)     | 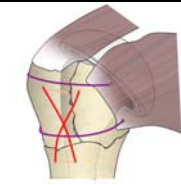   |    | 2 fins             | No holes         | 1                                                                                                | 1                     | 2                  | 0                        |
|                                |                                                                                     |                                                                                     |                    |                  | Neer III , Smith&Nephew<br>Two internally placed augmentation sutures<br>Vertical cross-stitches |                       |                    |                          |
| Dines 2002<br>Abrutyn 2003     |    | -                                                                                   | -                  | -                | 2                                                                                                | 1                     | 2                  | 0                        |
|                                |                                                                                     |                                                                                     |                    |                  | No remarks of implant type                                                                       |                       |                    |                          |
| Boileau OP-<br>Manual          |    |    | No fins            | One central hole | 0                                                                                                | 0                     | 2                  | 2                        |
|                                |                                                                                     |                                                                                     |                    |                  | Aequalis, Tornier                                                                                |                       |                    |                          |
| Voigt 2007                     |   |   | 2 fins             | 4 holes each     | 1                                                                                                | 1                     | 3                  | 0                        |
|                                |                                                                                     |                                                                                     |                    |                  | Two figures-of-eight tuberosities fixed at the head support.<br>Univers, Arthrex                 |                       |                    |                          |
| Gerber OP-<br>Manual           |  |  | No fins            | 2 holes          | 1                                                                                                | 1                     | 2                  | 0                        |
|                                |                                                                                     |                                                                                     |                    |                  | Anatomical Fracture, Zimmer                                                                      |                       |                    |                          |
| Krause 2007<br>Hertel          |  |  | No fins            | 2 holes          | 0                                                                                                | 0                     | 1                  | 2                        |
|                                |                                                                                     |                                                                                     |                    |                  | Cable system for the entire fixation<br>Epoca, Synthes                                           |                       |                    |                          |
| Reuther 2008                   |  |  | No fins            | 2 holes          | 1                                                                                                | 1                     | 2                  | 0                        |
|                                |                                                                                     |                                                                                     |                    |                  | Cable system around the GT-LT prosthesis<br>Affinis Fracture, Mathys Medical                     |                       |                    |                          |
| Beutler De<br>Wilde,<br>Poster |  |  | No fins            | 3 holes          | 1                                                                                                | 1                     | 2                  | 1                        |
|                                |                                                                                     |                                                                                     |                    |                  | Epoca, Synthes                                                                                   |                       |                    |                          |
